# Supplementary material for: Silicon amendment to rice plants impairs sucking behaviors and population growth in the phloem feeder Nilaparvata lugens (Hemiptera: Delphacidae)
Source: PubMed Central journal article supplement (PMC5430648; doi:10.1038/s41598-017-01060-4), 2017-04-24
Supplement: 41598_2017_1060_MOESM1_ESM.pdf [file 41598_2017_1060_MOESM1_ESM.pdf]

**Silicon amendment to rice plants impairs sucking behaviors and population growth in a phloem feeder *Nilaparvata lugens* (Hemiptera: Delphacidae)**

Lang Yang<sup>1,3</sup>, Yongqiang Han<sup>1,2,3</sup>, Pei Li<sup>1,3</sup>, Lizhang Wen<sup>2</sup>, and Maolin Hou<sup>1,3,\*</sup>

<sup>1</sup> State Key Laboratory for Biology of Plant Diseases and Insect Pests, Institute of Plant Protection, Chinese Academy of Agricultural Sciences, Beijing 100193, China

<sup>2</sup> College of Plant Protection, Hunan Agricultural University, Changsha 410128, China

<sup>3</sup> Southern Regional Collaborative Innovation Center for Grain and Oil Crops in China, Changsha 410128, China

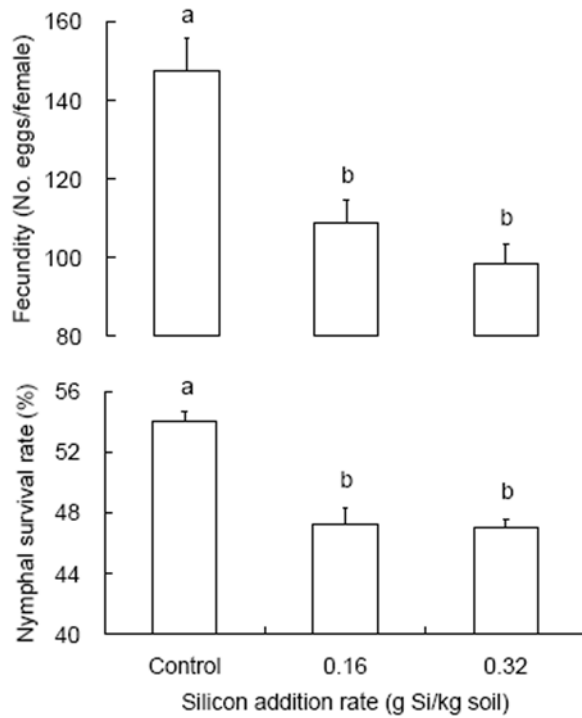

**Figure S1. Fecundity (A) and nymphal survival rate (B) of *Nilaparvata lugens* feeding on rice plants amended with Si or not.** Values are expressed as means  $\pm$  SE. Bars with different letters are significantly different (Tukey's multiple range test,  $P = 0.05$ ). Observation of fecundity was repeated for 30 times and of nymphal survival rate, for 3 times.

Supplementary dataset

Table S1 Silicon content in 40 DAT rice plants

| treatment | SiO <sub>2</sub> (mg/g DW) | Si (mg/g DW) |
|-----------|----------------------------|--------------|
| 0         | 31.58                      | 14.74        |
| 0         | 26.81                      | 12.51        |
| 0         | 31.58                      | 14.74        |
| 1         | 36.36                      | 16.97        |
| 1         | 36.36                      | 16.97        |
| 1         | 34.52                      | 16.11        |
| 2         | 40.77                      | 19.03        |
| 2         | 43.35                      | 20.23        |
| 2         | 44.45                      | 20.74        |

0 = control, 1 = 0.16 g Si/kg soi, 2 = 0.32 g Si/kg soil

Table S2 BPH adult settlement on rice plants in a choice test

| treatment | % settlement | treatment | % settlement | treatment | % settlement |
|-----------|--------------|-----------|--------------|-----------|--------------|
| 0         | 23.33        | 1         | 30.00        | 2         | 26.67        |
| 0         | 23.33        | 1         | 13.33        | 2         | 23.33        |
| 0         | 26.67        | 1         | 16.67        | 2         | 13.33        |
| 0         | 36.67        | 1         | 13.33        | 2         | 3.33         |
| 0         | 16.67        | 1         | 13.33        | 2         | 10.00        |
| 0         | 16.67        | 1         | 6.67         | 2         | 10.00        |
| 0         | 40.00        | 1         | 0.00         | 2         | 10.00        |
| 0         | 16.67        | 1         | 23.33        | 2         | 20.00        |
| 0         | 33.33        | 1         | 23.33        | 2         | 26.67        |
| 0         | 30.00        | 1         | 30.00        | 2         | 26.67        |
| 0         | 36.67        | 1         | 43.33        | 2         | 36.67        |
| 0         | 50.00        | 1         | 36.67        | 2         | 33.33        |
| 0         | 36.67        | 1         | 20.00        | 2         | 13.33        |
| 0         | 40.00        | 1         | 30.00        | 2         | 16.67        |
| 0         | 26.67        | 1         | 36.67        | 2         | 16.67        |
| 0         | 46.67        | 1         | 23.33        | 2         | 10.00        |
| 0         | 33.33        | 1         | 36.67        | 2         | 16.67        |
| 0         | 43.33        | 1         | 43.33        | 2         | 20.00        |
| 0         | 73.33        | 1         | 73.33        | 2         | 3.33         |
| 0         | 60.00        | 1         | 36.67        | 2         | 6.67         |
| 0         | 46.67        | 1         | 33.33        | 2         | 46.67        |
| 0         | 76.67        | 1         | 56.67        | 2         | 6.67         |
| 0         | 40.00        | 1         | 26.67        | 2         | 16.67        |
| 0         | 36.67        | 1         | 23.33        | 2         | 36.67        |
| 0         | 40.00        | 1         | 40.00        | 2         | 6.67         |
| 0         | 43.33        | 1         | 50.00        | 2         | 13.33        |
| 0         | 30.00        | 1         | 33.33        | 2         | 20.00        |
| 0         | 23.33        | 1         | 20.00        | 2         | 26.67        |
| 0         | 46.67        | 1         | 33.33        | 2         | 23.33        |
| 0         | 36.67        | 1         | 36.67        | 2         | 20.00        |

0 = control, 1 = 0.16 g Si/kg soi, 2 = 0.32 g Si/kg soil

Table S3 Honeydew excretion of BPH feeding on rice plants

| treatment | honeydew excretion (mg) | treatment | honeydew excretion (mg) | treatment | honeydew excretion (mg) |
|-----------|-------------------------|-----------|-------------------------|-----------|-------------------------|
| 0         | 10.1                    | 1         | 12.4                    | 2         | 5.9                     |
| 0         | 15.8                    | 1         | 15.4                    | 2         | 6.1                     |
| 0         | 18.2                    | 1         | 18.8                    | 2         | 7.0                     |
| 0         | 18.4                    | 1         | 25.5                    | 2         | 9.9                     |
| 0         | 20.0                    | 1         | 32.7                    | 2         | 12.6                    |
| 0         | 26.9                    | 1         | 33.9                    | 2         | 14.4                    |
| 0         | 32.6                    | 1         | 35.7                    | 2         | 16.5                    |
| 0         | 34.4                    | 1         | 38.7                    | 2         | 17.7                    |
| 0         | 34.6                    | 1         | 39.3                    | 2         | 19.3                    |
| 0         | 35.7                    | 1         | 40.1                    | 2         | 25.2                    |
| 0         | 36.3                    | 1         | 41.7                    | 2         | 31.2                    |
| 0         | 37.0                    | 1         | 43.6                    | 2         | 32.2                    |
| 0         | 39.4                    | 1         | 49.4                    | 2         | 33.5                    |
| 0         | 41.0                    | 1         | 49.5                    | 2         | 35.4                    |
| 0         | 43.6                    | 1         | 51.2                    | 2         | 35.5                    |
| 0         | 44.6                    | 1         | 52.9                    | 2         | 38.2                    |
| 0         | 45.3                    | 1         | 53.9                    | 2         | 38.4                    |
| 0         | 45.5                    | 1         | 53.9                    | 2         | 39.9                    |
| 0         | 48.7                    | 1         | 55.4                    | 2         | 41.4                    |
| 0         | 48.7                    | 1         | 58.9                    | 2         | 41.5                    |
| 0         | 65.4                    | 1         | 60.4                    | 2         | 47.8                    |
| 0         | 79.6                    | 1         | 61.0                    | 2         | 55.6                    |
| 0         | 90.7                    | 1         | 69.6                    | 2         | 56.5                    |
| 0         | 92.8                    | 1         | 70.7                    | 2         | 67.1                    |
| 0         | 99.5                    | 1         | 71.4                    |           |                         |
| 0         | 105.3                   |           |                         |           |                         |
| 0         | 134.8                   |           |                         |           |                         |

0 = control, 1 = 0.16 g Si/kg soi, 2 = 0.32 g Si/kg soil

Table S4 Mean duration of behavioral events recorded by EPG for BPH feeding on rice plants

| treatment | mean duration of np (min) | mean duration of Nc (N1 + N2 + N3) (min) | mean duration of N4a (min) | mean duration of N4b (min) |
|-----------|---------------------------|------------------------------------------|----------------------------|----------------------------|
| 0         | 0.37                      | 12.54                                    | 23.07                      | 50.11                      |
| 0         | 0.8                       | 13.73                                    | 13.33                      | 39.79                      |
| 0         | 0.84                      | 16.04                                    | 15.09                      | 59.63                      |
| 0         | 1.09                      | 12.40                                    | 26.46                      | 30.29                      |
| 0         | 1.1                       | 13.00                                    | 11.13                      | 21.35                      |
| 0         | 1.32                      | 20.32                                    | 18.79                      | 34.91                      |
| 0         | 1.33                      | 18.05                                    | 18.94                      | 28.31                      |
| 0         | 1.33                      | 19.50                                    | 21.59                      | 30.90                      |
| 0         | 1.43                      | 23.46                                    | 26.38                      | 41.91                      |
| 0         | 1.56                      | 28.73                                    | 28.06                      | 76.60                      |
| 0         | 2.07                      | 29.79                                    | 35.03                      | 71.56                      |
| 0         | 2.54                      | 24.22                                    | 38.87                      | 54.16                      |
| 1         | 0.83                      | 13.49                                    | 0.00                       | 14.15                      |
| 1         | 0.87                      | 17.70                                    | 11.11                      | 49.81                      |
| 1         | 1.51                      | 8.61                                     | 11.19                      | 25.48                      |
| 1         | 1.65                      | 11.24                                    | 12.93                      | 21.37                      |
| 1         | 1.7                       | 16.73                                    | 5.16                       | 24.39                      |
| 1         | 1.74                      | 12.62                                    | 15.79                      | 59.68                      |
| 1         | 2.19                      | 13.61                                    | 8.38                       | 25.10                      |
| 1         | 2.28                      | 16.70                                    | 8.60                       | 23.50                      |
| 1         | 2.35                      | 17.93                                    | 13.04                      | 24.29                      |
| 1         | 2.35                      | 19.46                                    | 16.92                      | 54.08                      |
| 1         | 3.12                      | 21.81                                    | 20.86                      | 31.88                      |
| 1         | 3.56                      | 29.74                                    | 23.15                      | 44.49                      |
| 1         | 4.89                      | 24.62                                    | 17.74                      | 35.60                      |
| 2         | 2.54                      | 37.41                                    | 0.00                       | 31.10                      |
| 2         | 2.85                      | 28.85                                    | 11.48                      | 22.56                      |
| 2         | 2.86                      | 39.76                                    | 24.03                      | 13.77                      |
| 2         | 2.92                      | 11.28                                    | 34.04                      | 23.10                      |
| 2         | 2.95                      | 12.53                                    | 16.03                      | 9.90                       |
| 2         | 4.28                      | 13.27                                    | 10.40                      | 8.76                       |
| 2         | 4.33                      | 15.62                                    | 15.07                      | 17.13                      |
| 2         | 1.41                      | 17.58                                    | 15.70                      | 14.01                      |
| 2         | 4.47                      | 22.59                                    | 16.48                      | 9.73                       |
| 2         | 1.57                      | 25.57                                    | 21.10                      | 25.29                      |
| 2         | 1.96                      | 26.50                                    | 34.40                      | 26.65                      |
| 2         | 2.43                      | 43.91                                    | 35.33                      | 54.00                      |
| 2         | 1.4                       | 56.84                                    | 29.15                      | 41.31                      |
| 2         | 2.73                      | 46.62                                    | 20.48                      | 18.98                      |

0 = control, 1 = 0.16 g Si/kg soi, 2 = 0.32 g Si/kg soil

Table S5 Total duration of behavioral events recorded by EPG for BPH feeding on rice plants

| treatment | total duration of np (min) | total duration of Nc (N1 + N2 + N3) (min) | total duration of N4a (min) | total duration of N4b (min) |
|-----------|----------------------------|-------------------------------------------|-----------------------------|-----------------------------|
| 0         | 0.37                       | 97.49                                     | 71.33                       | 22.98                       |
| 0         | 0.84                       | 107.08                                    | 67.29                       | 42.99                       |
| 0         | 1.43                       | 121.95                                    | 70.39                       | 35.11                       |
| 0         | 1.56                       | 115.04                                    | 62.89                       | 58.25                       |
| 0         | 1.61                       | 123.38                                    | 61.03                       | 51.13                       |
| 0         | 3.96                       | 135.32                                    | 88.87                       | 24.03                       |
| 0         | 4.34                       | 126.07                                    | 93.97                       | 41.59                       |
| 0         | 5.08                       | 108.30                                    | 100.13                      | 41.71                       |
| 0         | 6.62                       | 112.33                                    | 105.51                      | 75.60                       |
| 0         | 10.63                      | 118.17                                    | 80.10                       | 83.87                       |
| 0         | 16.59                      | 126.09                                    | 90.10                       | 90.56                       |
| 0         | 19.96                      | 132.04                                    | 85.37                       | 84.16                       |
| 1         | 0.83                       | 98.71                                     | 52.23                       | 43.85                       |
| 1         | 1.51                       | 110.49                                    | 62.21                       | 44.38                       |
| 1         | 3.56                       | 137.75                                    | 42.37                       | 19.90                       |
| 1         | 4.33                       | 120.89                                    | 47.37                       | 21.44                       |
| 1         | 4.89                       | 108.25                                    | 26.40                       | 18.58                       |
| 1         | 6.25                       | 124.33                                    | 46.43                       | 48.10                       |
| 1         | 6.79                       | 144.92                                    | 65.19                       | 22.77                       |
| 1         | 8.75                       | 166.53                                    | 94.63                       | 13.50                       |
| 1         | 13.67                      | 176.04                                    | 99.44                       | 28.59                       |
| 1         | 16.42                      | 179.84                                    | 100.55                      | 51.88                       |
| 1         | 23.16                      | 196.70                                    | 78.30                       | 83.49                       |
| 1         | 24.40                      | 168.20                                    | 80.22                       | 77.60                       |
| 1         | 42.34                      | 151.32                                    | 60.28                       | 82.25                       |
| 2         | 0.86                       | 102.84                                    | 70.21                       | 15.02                       |
| 2         | 0.92                       | 126.45                                    | 54.43                       | 14.75                       |
| 2         | 2.69                       | 152.16                                    | 20.80                       | 24.28                       |
| 2         | 2.85                       | 148.74                                    | 24.18                       | 31.04                       |
| 2         | 3.93                       | 121.55                                    | 30.17                       | 9.84                        |
| 2         | 7.65                       | 125.89                                    | 42.20                       | 4.52                        |
| 2         | 9.42                       | 126.61                                    | 45.20                       | 14.16                       |
| 2         | 21.33                      | 145.30                                    | 48.48                       | 21.10                       |
| 2         | 32.69                      | 172.31                                    | 65.90                       | 0.00                        |
| 2         | 32.83                      | 180.88                                    | 68.79                       | 26.65                       |
| 2         | 34.56                      | 215.75                                    | 78.31                       | 49.30                       |
| 2         | 34.72                      | 182.00                                    | 56.00                       | 75.86                       |
| 2         | 52.51                      | 206.42                                    | 109.88                      | 51.31                       |
| 2         | 57.00                      | 184.08                                    | 90.95                       | 28.98                       |

0 = control, 1 = 0.16 g Si/kg soi, 2 = 0.32 g Si/kg soil

Table S6 Duration of the first non-probing event recorded by EPG for BPH feeding on rice plants

| treatment                                                | duration of the first np (min) | treatment | duration of the first np (min) | treatment | duration of the first np (min) |
|----------------------------------------------------------|--------------------------------|-----------|--------------------------------|-----------|--------------------------------|
| 0                                                        | 2.96                           | 1         | 2.96                           | 2         | 2.96                           |
| 0                                                        | 1.56                           | 1         | 2.15                           | 2         | 2.96                           |
| 0                                                        | 1.23                           | 1         | 4.89                           | 2         | 3.64                           |
| 0                                                        | 1.78                           | 1         | 3.56                           | 2         | 2.15                           |
| 0                                                        | 2.58                           | 1         | 3.17                           | 2         | 4.45                           |
| 0                                                        | 1.49                           | 1         | 2.12                           | 2         | 2.3                            |
| 0                                                        | 3.57                           | 1         | 2.38                           | 2         | 4.13                           |
| 0                                                        | 0.84                           | 1         | 1.29                           | 2         | 3.92                           |
| 0                                                        | 0.71                           | 1         | 1.29                           | 2         | 3.89                           |
| 0                                                        | 0.37                           | 1         | 2.75                           | 2         | 4.77                           |
| 0                                                        | 1.43                           | 1         | 2.1                            | 2         | 4.86                           |
| 0                                                        | 1.39                           | 1         | 1.51                           | 2         | 4.33                           |
|                                                          |                                | 1         | 0.83                           | 2         | 2.7                            |
|                                                          |                                |           |                                | 2         | 5.06                           |
| 0 = control, 1 = 0.16 g Si/kg soi, 2 = 0.32 g Si/kg soil |                                |           |                                |           |                                |

Table S7 Time needed to reach the first N4a event recorded by EPG for BPH feeding on rice plants

| treatment                                                | time needed to the first N4a (min) | treatment | time needed to the first N4a (min) | treatment | time needed to the first N4a (min) |
|----------------------------------------------------------|------------------------------------|-----------|------------------------------------|-----------|------------------------------------|
| 0                                                        | 64.34                              | 1         | 103.94                             | 2         | 214.42                             |
| 0                                                        | 107.88                             | 1         | 158.77                             | 2         | 276.17                             |
| 0                                                        | 108.21                             | 1         | 189.62                             | 2         | 229.99                             |
| 0                                                        | 120.43                             | 1         | 101.33                             | 2         | 172.71                             |
| 0                                                        | 145.55                             | 1         | 161.61                             | 2         | 275.15                             |
| 0                                                        | 163.35                             | 1         | 209.75                             | 2         | 149.36                             |
| 0                                                        | 146.25                             | 1         | 84.03                              | 2         | 162.84                             |
| 0                                                        | 125.06                             | 1         | 131.34                             | 2         | 164.21                             |
| 0                                                        | 113.35                             | 1         | 174.00                             | 2         | 218.51                             |
| 0                                                        | 155.13                             | 1         | 200.54                             | 2         | 259.01                             |
| 0                                                        | 201.13                             | 1         | 128.60                             | 2         | 173.09                             |
| 0                                                        | 158.93                             | 1         | 160.00                             | 2         | 200.00                             |
|                                                          |                                    | 1         | 170.76                             | 2         | 275.93                             |
|                                                          |                                    |           |                                    | 2         | 189.90                             |
| 0 = control, 1 = 0.16 g Si/kg soi, 2 = 0.32 g Si/kg soil |                                    |           |                                    |           |                                    |



Table S8 Total duration of N4a followed by N4b recorded by EPG for BPH feeding on rice plants

| treatment                                                           | total duration of N4a followed by N4b (min) |
|---------------------------------------------------------------------|---------------------------------------------|
| 0                                                                   | 33.33                                       |
| 0                                                                   | 17.41                                       |
| 0                                                                   | 19.36                                       |
| 0                                                                   | 22.60                                       |
| 0                                                                   | 23.20                                       |
| 0                                                                   | 37.89                                       |
| 0                                                                   | 40.12                                       |
| 0                                                                   | 60.20                                       |
| 0                                                                   | 50.70                                       |
| 0                                                                   | 82.73                                       |
| 1                                                                   | 67.45                                       |
| 1                                                                   | 48.19                                       |
| 1                                                                   | 73.18                                       |
| 1                                                                   | 81.41                                       |
| 1                                                                   | 96.27                                       |
| 1                                                                   | 67.01                                       |
| 2                                                                   | 68.27                                       |
| 2                                                                   | 67.32                                       |
| 2                                                                   | 77.48                                       |
| 2                                                                   | 89.61                                       |
| 2                                                                   | 104.82                                      |
| treatment: 0 = control, 1 = 0.16 g Si/kg soi, 2 = 0.32 g Si/kg soil |                                             |

Table S9 Total duration of N4a followed by sustained N4b recorded by EPG for BPH feeding on rice plants

| treatment                                                           | total duration of N4a followed by sustained N4b (min) |
|---------------------------------------------------------------------|-------------------------------------------------------|
| 0                                                                   | 17.41                                                 |
| 0                                                                   | 19.53                                                 |
| 0                                                                   | 22.60                                                 |
| 0                                                                   | 23.33                                                 |
| 0                                                                   | 30.01                                                 |
| 0                                                                   | 37.89                                                 |
| 0                                                                   | 40.11                                                 |
| 0                                                                   | 52.73                                                 |
| 0                                                                   | 60.20                                                 |
| 0                                                                   | 70.54                                                 |
| 1                                                                   | 50.68                                                 |
| 1                                                                   | 48.19                                                 |
| 1                                                                   | 73.18                                                 |
| 1                                                                   | 81.41                                                 |
| 1                                                                   | 96.27                                                 |
| 1                                                                   | 67.01                                                 |
| 2                                                                   | 68.27                                                 |
| 2                                                                   | 67.32                                                 |
| 2                                                                   | 77.48                                                 |
| 2                                                                   | 89.61                                                 |
| 2                                                                   | 104.82                                                |
| treatment: 0 = control, 1 = 0.16 g Si/kg soi, 2 = 0.32 g Si/kg soil |                                                       |

Table S10 Frequency of sustained N4b recorded by EPG for BPH feeding on rice plants

| treatment                                                           | occurrence of sustained N4b | frequency of sustained N4b |
|---------------------------------------------------------------------|-----------------------------|----------------------------|
| 0                                                                   | 0                           | 2                          |
| 0                                                                   | 1                           | 10                         |
| 1                                                                   | 0                           | 7                          |
| 1                                                                   | 1                           | 6                          |
| 2                                                                   | 0                           | 9                          |
| 2                                                                   | 1                           | 5                          |
| treatment: 0 = control, 1 = 0.16 g Si/kg soi, 2 = 0.32 g Si/kg soil |                             |                            |
| occurrence: 0 = no, 1 = yes                                         |                             |                            |

Table S11 Frequency of sustained N4b recorded by EPG for BPH feeding on rice plants

| treatment | probing duration per insect (min) | treatment | probing duration per insect (min) | treatment | probing duration per insect (min) |
|-----------|-----------------------------------|-----------|-----------------------------------|-----------|-----------------------------------|
| 0         | 340.04                            | 1         | 330.64                            | 2         | 207.49                            |
| 0         | 343.41                            | 1         | 335.60                            | 2         | 303.00                            |
| 0         | 349.37                            | 1         | 336.84                            | 2         | 345.28                            |
| 0         | 353.38                            | 1         | 343.58                            | 2         | 345.44                            |
| 0         | 354.92                            | 1         | 346.33                            | 2         | 347.17                            |
| 0         | 355.66                            | 1         | 351.25                            | 2         | 347.31                            |
| 0         | 356.04                            | 1         | 353.21                            | 2         | 350.58                            |
| 0         | 358.39                            | 1         | 353.75                            | 2         | 352.35                            |
| 0         | 358.44                            | 1         | 355.11                            | 2         | 356.07                            |
| 0         | 358.57                            | 1         | 355.67                            | 2         | 357.15                            |
| 0         | 359.16                            | 1         | 356.44                            | 2         | 357.31                            |
| 0         | 359.63                            | 1         | 358.49                            | 2         | 358.67                            |
|           |                                   | 1         | 359.17                            | 2         | 359.08                            |
|           |                                   |           |                                   | 2         | 359.14                            |

0 = control, 1 = 0.16 g Si/kg soi, 2 = 0.32 g Si/kg soil

Table S12 Life table parameters of BPH feeding on rice plants

|           | survival rate   |                              |                           |                                            |                                        |                                          |                                       |
|-----------|-----------------|------------------------------|---------------------------|--------------------------------------------|----------------------------------------|------------------------------------------|---------------------------------------|
| treatment | egg             | 1st instar                   | 2nd instar                | 3rd instar                                 | 4th instar                             | 5th instar                               | female rate                           |
| 0         | 0.874           | 0.900                        | 0.889                     | 0.929                                      | 0.885                                  | 0.804                                    | 0.51                                  |
| 0         | 0.874           | 0.914                        | 0.906                     | 0.931                                      | 0.889                                  | 0.792                                    | 0.52                                  |
| 0         | 0.874           | 0.930                        | 0.894                     | 0.932                                      | 0.873                                  | 0.813                                    | 0.51                                  |
| 1         | 0.842           | 0.890                        | 0.877                     | 0.912                                      | 0.865                                  | 0.733                                    | 0.48                                  |
| 1         | 0.842           | 0.904                        | 0.894                     | 0.915                                      | 0.870                                  | 0.745                                    | 0.49                                  |
| 1         | 0.842           | 0.892                        | 0.879                     | 0.914                                      | 0.887                                  | 0.766                                    | 0.50                                  |
| 2         | 0.858           | 0.917                        | 0.879                     | 0.914                                      | 0.868                                  | 0.739                                    | 0.50                                  |
| 2         | 0.858           | 0.903                        | 0.892                     | 0.897                                      | 0.865                                  | 0.733                                    | 0.49                                  |
| 2         | 0.858           | 0.890                        | 0.908                     | 0.915                                      | 0.870                                  | 0.745                                    | 0.47                                  |
| treatment | eggs/<br>female | population<br>trend<br>index | generation<br>time (T, d) | intrinsic rate<br>of increase<br>( $r_m$ ) | population<br>doubling<br>time (DT, d) | finite rate of<br>increase ( $\lambda$ ) | net<br>reproductive<br>rate ( $R_0$ ) |
| 0         | 147.6           | 34.99                        | 36.04                     | 0.099                                      | 7.027                                  | 1.104                                    | 34.990                                |
| 0         | 147.6           | 36.10                        | 35.78                     | 0.100                                      | 6.915                                  | 1.105                                    | 36.103                                |
| 0         | 147.6           | 36.41                        | 36.73                     | 0.098                                      | 7.083                                  | 1.103                                    | 36.410                                |
| 1         | 108.8           | 20.08                        | 35.31                     | 0.085                                      | 8.158                                  | 1.089                                    | 20.082                                |
| 1         | 108.8           | 21.34                        | 35.61                     | 0.086                                      | 8.065                                  | 1.090                                    | 21.340                                |
| 1         | 108.8           | 22.29                        | 36.24                     | 0.086                                      | 8.092                                  | 1.089                                    | 22.290                                |
| 2         | 98.7            | 19.98                        | 33.25                     | 0.090                                      | 7.695                                  | 1.094                                    | 19.983                                |
| 2         | 98.7            | 18.84                        | 34.19                     | 0.086                                      | 8.073                                  | 1.090                                    | 18.842                                |
| 2         | 98.7            | 19.16                        | 35.15                     | 0.084                                      | 8.252                                  | 1.088                                    | 19.164                                |

0 = control, 1 = 0.16 g Si/kg soi, 2 = 0.32 g Si/kg soil

Table S13 Fecundity of BPH feeding on rice plants

| treatment                                                | eggs/female | treatment | eggs/female | treatment | eggs/female |
|----------------------------------------------------------|-------------|-----------|-------------|-----------|-------------|
| 0                                                        | 112         | 1         | 96          | 2         | 78          |
| 0                                                        | 192         | 1         | 40          | 2         | 92          |
| 0                                                        | 183         | 1         | 136         | 2         | 99          |
| 0                                                        | 136         | 1         | 99          | 2         | 96          |
| 0                                                        | 86          | 1         | 144         | 2         | 103         |
| 0                                                        | 99          | 1         | 78          | 2         | 30          |
| 0                                                        | 121         | 1         | 131         | 2         | 143         |
| 0                                                        | 140         | 1         | 89          | 2         | 79          |
| 0                                                        | 141         | 1         | 124         | 2         | 138         |
| 0                                                        | 143         | 1         | 169         | 2         | 134         |
| 0                                                        | 104         | 1         | 90          | 2         | 131         |
| 0                                                        | 64          | 1         | 94          | 2         | 105         |
| 0                                                        | 176         | 1         | 87          | 2         | 86          |
| 0                                                        | 193         | 1         | 101         | 2         | 104         |
| 0                                                        | 131         | 1         | 131         | 2         | 86          |
| 0                                                        | 108         | 1         | 133         | 2         | 85          |
| 0                                                        | 133         | 1         | 63          | 2         | 142         |
| 0                                                        | 162         | 1         | 131         | 2         | 83          |
| 0                                                        | 123         | 1         | 80          | 2         | 81          |
| 0                                                        | 170         | 1         | 48          | 2         | 58          |
| 0                                                        | 246         | 1         | 139         | 2         | 64          |
| 0                                                        | 73          | 1         | 121         | 2         | 144         |
| 0                                                        | 176         | 1         | 80          | 2         | 89          |
| 0                                                        | 158         | 1         | 90          | 2         | 106         |
| 0                                                        | 236         | 1         | 123         | 2         | 109         |
| 0                                                        | 201         | 1         | 109         | 2         | 101         |
| 0                                                        | 128         | 1         | 115         | 2         | 118         |
| 0                                                        | 189         | 1         | 143         | 2         | 94          |
| 0                                                        | 121         | 1         | 125         | 2         | 89          |
| 0                                                        | 184         | 1         | 156         | 2         | 93          |
| 0 = control, 1 = 0.16 g Si/kg soi, 2 = 0.32 g Si/kg soil |             |           |             |           |             |

Table S14 Nymphal survival of BPH feeding on rice plants

| treatment                                                | Nymphal survival rate (%) |
|----------------------------------------------------------|---------------------------|
| 0                                                        | 52.86                     |
| 0                                                        | 54.29                     |
| 0                                                        | 54.93                     |
| 1                                                        | 45.21                     |
| 1                                                        | 47.95                     |
| 1                                                        | 48.65                     |
| 2                                                        | 47.22                     |
| 2                                                        | 45.83                     |
| 2                                                        | 47.95                     |
| 0 = control, 1 = 0.16 g Si/kg soi, 2 = 0.32 g Si/kg soil |                           |
